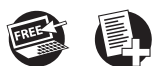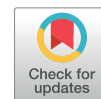

# Is It Time to Change the Type 2 Diabetes Treatment Paradigm? Yes! GLP-1 RAs Should Replace Metformin in the Type 2 Diabetes Algorithm

Muhammad Abdul-Ghani<sup>1,2</sup> and  
Ralph A. DeFronzo<sup>1</sup>

*Diabetes Care* 2017;40:1121–1127 | <https://doi.org/10.2337/dc16-2368>

Most treatment guidelines, including those from the American Diabetes Association/European Association for the Study of Diabetes and the International Diabetes Federation, suggest metformin be used as the first-line therapy after diet and exercise. This recommendation is based on the considerable body of evidence that has accumulated over the last 30 years, but it is also supported on clinical grounds based on metformin's affordability and tolerability. As such, metformin is the most commonly used oral antihyperglycemic agent in the U.S. However, based on the release of newer agents over the recent past, some have suggested that the modern approach to disease management should be based upon identification of its etiology and correcting the underlying biological disturbances. That is, we should use interventions that normalize or at least ameliorate the recognized derangements in physiology that drive the clinical manifestation of disease, in this circumstance, hyperglycemia. Thus, it is argued that therapeutic interventions that target glycemia but do not correct the underlying pathogenic disturbances are unlikely to result in a sustained benefit on the disease process. In our field, there is an evolving debate regarding the suggested first step in diabetes management and a call for a new paradigm. Given the current controversy, we provide a Point-Counterpoint debate on this issue. In the point narrative below that precedes the counterpoint narrative, Drs. Abdul-Ghani and DeFronzo provide their argument that a treatment approach for type 2 diabetes based upon correcting the underlying pathophysiological abnormalities responsible for the development of hyperglycemia provides the best therapeutic strategy. Such an approach requires a change in the recommendation for first-line therapy from metformin to a GLP-1 receptor agonist. In the counterpoint narrative that follows Drs. Abdul-Ghani and DeFronzo's contribution, Dr. Inzucchi argues that, based on the medical community's extensive experience and the drug's demonstrated efficacy, safety, low cost, and cardiovascular benefits, metformin should remain the "foundation therapy" for all patients with type 2 diabetes, barring contraindications.

—William T. Cefalu

Chief Scientific, Medical & Mission Officer, American Diabetes Association

The modern approach to disease management is based upon identification of its etiology and correcting the underlying pathophysiological disturbances with interventions that ameliorate/normalize known defects responsible for the clinical manifestation of the disease, i.e., hyperglycemia. Therapeutic interventions that simply target hyperglycemia but do not correct the underlying pathogenic disturbances are unlikely

<sup>1</sup>Division of Diabetes, University of Texas Health Science Center at San Antonio, San Antonio, TX

<sup>2</sup>Diabetes Research, Academic Health System, Hamad General Hospital, Doha, Qatar

Corresponding author: Muhammad Abdul-Ghani, [abdulghani@uthscsa.edu](mailto:abdulghani@uthscsa.edu).

M.A.-G. and R.A.D. contributed equally to this article.

© 2017 by the American Diabetes Association. Readers may use this article as long as the work is properly cited, the use is educational and not for profit, and the work is not altered. More information is available at <http://www.diabetesjournals.org/content/license>.

See accompanying article, p. 1128.

to result in a sustained reduction in HbA<sub>1c</sub>. It is well established that type 2 diabetes (T2D) is a complex metabolic/cardiovascular disorder with at least eight distinct pathophysiological disturbances, referred to as the Ominous Octet (1). Hyperglycemia is a manifestation of these eight pathophysiological abnormalities. Nonetheless, the current recommended approach in T2D management still focuses on lowering the plasma glucose concentration rather than correcting the underlying metabolic abnormalities that cause the hyperglycemia (2–4). Therefore, it is not surprising that current therapeutic guidelines (2–4) do not result in a sustained HbA<sub>1c</sub> reduction (5–8). In this Point-Counterpoint, we argue that it is time to apply the modern concepts of clinical practice to diabetes management and base therapy on pathophysiology. Thereby, GLP-1 receptor agonists (GLP-1 RAs), which 1) correct six of the eight components of the Ominous Octet, 2) prevent/reverse the progressive  $\beta$ -cell failure and rise in HbA<sub>1c</sub>, and 3) lower cardiovascular risk in T2D independent of their glucose-lowering ability (9,10), should replace metformin as the recommended first-line therapy in newly diagnosed T2D patients.

### PATHOPHYSIOLOGY OF T2D

The etiology of T2D is complex and involves multiple pathophysiological disturbances involving multiple organs (1) (Fig. 1).

Insulin resistance in skeletal muscle, liver, and adipocytes (11–15) and  $\beta$ -cell dysfunction (16–22) remain the major core defects responsible for the development and progression of hyperglycemia. Insulin resistance is also associated with multiple metabolic abnormalities, e.g., hypertension, dyslipidemia, endothelial dysfunction, procoagulant state, inflammation, and visceral obesity, which collectively are known as the insulin resistance (metabolic) syndrome (23–25). Each individual component of the insulin resistance syndrome, as well as the basic molecular etiology of the insulin resistance (25), is causally related to the development of atherosclerotic cardiovascular disease (CVD) and contributes to the increased risk for CVD in T2D patients.

Because progressive  $\beta$ -cell failure is the principal factor responsible for the development and progression of hyperglycemia in T2D patients (1,16–19), only therapies that halt/reverse the progressive  $\beta$ -cell failure will be effective in lowering and maintaining HbA<sub>1c</sub> at the target level, and ideally this should be accomplished without increasing the risk of hypoglycemia.

In addition to insulin resistance and  $\beta$ -cell dysfunction, impaired incretin effect in T2D plays a major role in the progression of  $\beta$ -cell failure and hyperglycemia (26,27). Further, T2D patients have elevated fasting plasma glucagon levels that fail to suppress normally after

a meal and enhanced hepatic sensitivity to glucagon (28,29), in part due to resistance to GLP-1 (26,30); these pathophysiological abnormalities can be reversed with GLP-1 RA therapy (26,31).

### BIOLOGICAL ACTIONS OF GLP-1 RAs

Activation of GLP-1 receptors in the  $\beta$ -cell amplifies glucose-stimulated insulin secretion but only under conditions of hyperglycemia (26,32), whereas in the  $\alpha$ -cell, GLP-1 suppresses glucagon secretion, leading to correction of postmeal hyperglycemia in T2D (26,27,30). GLP-1 RAs improve  $\beta$ -cell function by enhancing  $\beta$ -cell responsiveness to glucose, i.e., improving  $\beta$ -cell glucose sensitivity; this beneficial effect on the  $\beta$ -cell can be observed within 8 h after a single injection of the GLP-1 RA (liraglutide) (33), is maintained at 3 months (semaglutide) (34), and persists for at least 3 years (exenatide) (35). Thus, GLP-1 RAs produce a rapid and durable reduction in HbA<sub>1c</sub> with low risk of hypoglycemia (36,37).

GLP-1 also exerts multiple nonglycemic actions, all of which improve metabolic control in T2D patients (Table 1), including 1) delayed gastric emptying, which slows the absorption of ingested glucose (32), 2) appetite suppression, which promotes weight loss (26,38,39), 3) reduction of hepatic and visceral fat content (40), making them an attractive intervention to prevent/reverse non-alcoholic fatty liver disease/nonalcoholic steatohepatitis (41), and 4) prevention of diabetic nephropathy in Liraglutide Effect and Action in Diabetes: Evaluation of Cardiovascular Outcome Results—A Long Term Evaluation (LEADER) (42). Recent evidence suggests that gut stimulation of GLP-1 secretion by the L cells is an important mechanism via which metformin suppresses hepatic glucose production (43,44).

### GLP-1 RAs AND CVD

CVD is the leading cause of death in T2D patients (45), accounting for ~80% of mortality, and T2D is best viewed as a cardiometabolic disorder (25,46). Thus, reducing CVD risk is a high priority in T2D management, and reduction in blood pressure and correction of diabetic dyslipidemia are essential components of diabetes management. Considerable evidence documents that hyperglycemia is a weak risk factor for cardiovascular

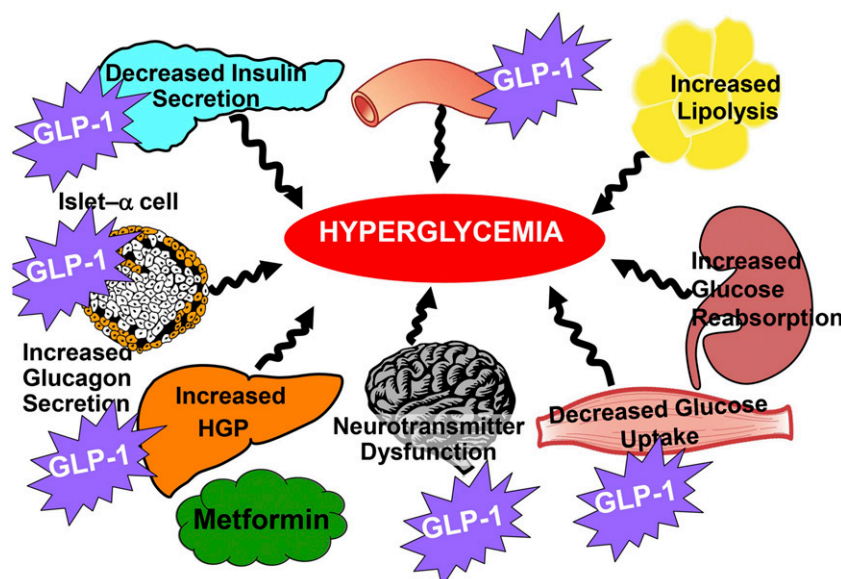

**Figure 1**—GLP-1 RAs correct six components of the Ominous Octet, whereas metformin corrects only one component.

**Table 1—Metabolic actions of GLP-1 RAs**

|                                                                                                                                                                                                                                                                                                                                                                       |
|-----------------------------------------------------------------------------------------------------------------------------------------------------------------------------------------------------------------------------------------------------------------------------------------------------------------------------------------------------------------------|
| <ul style="list-style-type: none"> <li>• Pancreas                     <ul style="list-style-type: none"> <li>Potentiate glucose-mediated insulin secretion</li> <li>Preserve <math>\beta</math>-cell function/reverse <math>\beta</math>-cell failure</li> <li>Inhibit glucagon secretion in a glucose-dependent fashion</li> </ul> </li> </ul>                       |
| <ul style="list-style-type: none"> <li>• Cardiovascular system                     <ul style="list-style-type: none"> <li>Reduce MACE</li> <li>Reduce systolic blood pressure</li> <li>Reduce pulmonary capillary wedge pressure</li> <li>Increase myocardial salvage following myocardial infarction</li> <li>Improve endothelial dysfunction</li> </ul> </li> </ul> |
| <ul style="list-style-type: none"> <li>• GI                     <ul style="list-style-type: none"> <li>Slow gastric emptying</li> <li>Inhibit hepatic glucose production</li> <li>Decrease liver fat content</li> <li>Decrease visceral fat</li> </ul> </li> </ul>                                                                                                    |
| <ul style="list-style-type: none"> <li>• Central nervous system                     <ul style="list-style-type: none"> <li>Suppress appetite</li> </ul> </li> </ul>                                                                                                                                                                                                   |
| <ul style="list-style-type: none"> <li>• Kidney                     <ul style="list-style-type: none"> <li>Preserve renal function</li> <li>Increase sodium excretion</li> </ul> </li> </ul>                                                                                                                                                                          |
| <ul style="list-style-type: none"> <li>• General                     <ul style="list-style-type: none"> <li>Promote weight loss</li> </ul> </li> </ul>                                                                                                                                                                                                                |

complications and improving glucose control has little benefit on macrovascular disease risk (UK Prospective Diabetes Study [UKPDS], Action to Control Cardiovascular Risk in Diabetes [ACCORD], Action in Diabetes and Vascular Disease: Preterax and Diamicon MR Controlled Evaluation [ADVANCE], Veterans Affairs Diabetes Trial [VADT]), especially when

it is well established. Numerous clinical trials have demonstrated that antidiabetes agents that reduce plasma glucose without altering other cardiovascular risk factors fail to reduce CVD risk in T2D patients. Conversely, antidiabetes medications that in addition to lowering the plasma glucose concentration also improve cardiovascular risk factors, e.g., GLP-1 RAs (9,10), pioglitazone (47,48), and SGLT2 inhibitors (49,50), significantly reduce cardiovascular events in T2D with established CVD. Thus, these agents should be favored over agents that lower plasma glucose but have no effect on cardiovascular risk factors or CVD, e.g., sulfonylureas (51,52), DPP-4 inhibitors (53–55), and insulin (56) (Fig. 2). GLP-1 RAs consistently have been shown to reduce many CVD risk factors (Table 2) (25,34,57–60). Thus, it is not surprising that two large, prospective, randomized, double-blind, placebo-controlled trials (9,10) have demonstrated that liraglutide and semaglutide significantly lower the incidence of 3-point MACE (major adverse cardiovascular events), which includes nonfatal myocardial infarction, nonfatal stroke, and cardiovascular death, by 13% and 24%, respectively, in T2D patients with existing CVD. Of note, despite the high CVD risk in the patient populations in both LEADER and Trial to Evaluate Cardiovascular and Other Long-term Outcomes With Semaglutide in Subjects With Type 2 Diabetes (SUSTAIN-6), all cardiovascular risk factors, including blood pressure and LDL cholesterol, were well controlled at baseline,

consistent with the high number of patients receiving statins, ACE inhibitors, angiotensin receptor blockers, and aspirin therapy. Addition of the GLP-1 RA to the patients' antidiabetes treatment resulted in only modest reductions in HbA<sub>1c</sub> (0.4%) and systolic blood pressure (~2–3 mmHg) in LEADER and SUSTAIN-6; these glucose- and blood pressure-lowering effects are quite modest and unlikely to explain the CVD benefit of liraglutide and semaglutide. This suggests the GLP-1 RAs may have a direct beneficial action to slow the atherosclerotic process, independent of their effect to reduce glycemia and improve traditional cardiovascular risk factors (59).

The above review demonstrates that GLP-1 RAs directly and/or indirectly correct/improve six of the eight pathophysiological defects responsible for hyperglycemia in T2D, improve cardiovascular risk factors, and reduce MACE in two large, well-designed, prospective cardiovascular intervention trials.

**GLP-1 RAs, NOT METFORMIN, SHOULD BE THE FIRST-LINE THERAPY IN T2D**

GLP-1 RAs correct six members of the Ominous Octet, whereas the only known action of metformin is to inhibit hepatic glucose production (61) (Fig. 1 and Table 2). Contrary to common belief, metformin is not an insulin sensitizer in muscle or adipocytes (61–63) in the absence of weight loss, which is a frequent occurrence in patients treated with the biguanide (Fig. 3A). Consistent with this, following intravenous administration of <sup>11</sup>C-metformin, none of the biguanide can be detected in muscle (64). Most importantly, and in direct contrast to the GLP-1 RAs, metformin lacks any effect on  $\beta$ -cell function (61,62) (Fig. 3B), which is the primary pathophysiological disturbance responsible for progressive hyperglycemia in T2D patients (1). This is most graphically demonstrated in the UKPDS (65) and A Diabetes Outcome Progression Trial (ADOPT) (5) (Fig. 3D) in which, after an initial decline during the first year, HbA<sub>1c</sub> rose progressively because of progressive  $\beta$ -cell failure. This stands in marked contrast to the GLP-1 RAs, which exert a potent protective effect on the  $\beta$ -cell that persists for at least 3 years (34). Because the GLP-1 RAs cause significant weight loss, they also improve insulin sensitivity in muscle. Thus, GLP-1 RAs, but not metformin, correct the two

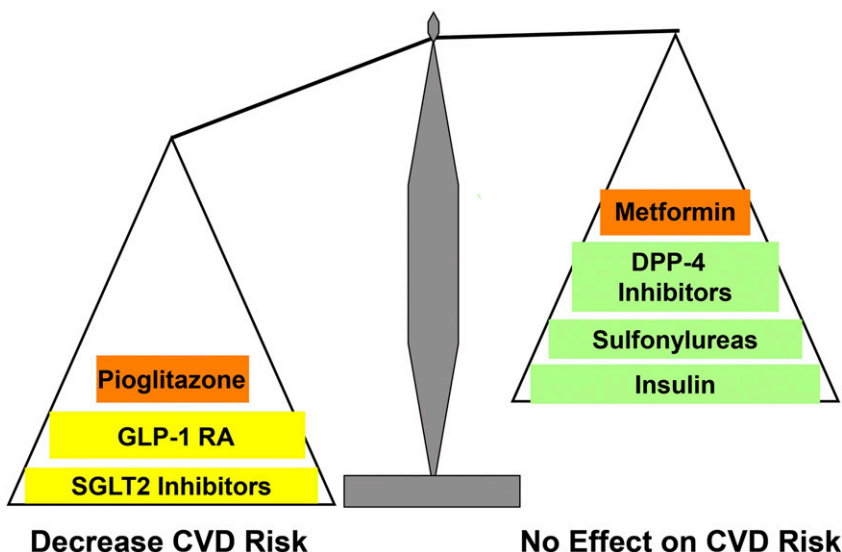

**Figure 2**—Not all antidiabetes agents are equal in their ability to reduce cardiovascular risk.

**Table 2—Benefits of GLP-1 RAs far outweigh those of metformin**

|                                                | GLP-1 RAs                                       | Metformin                               |
|------------------------------------------------|-------------------------------------------------|-----------------------------------------|
| Pathophysiological defects in T2D (see Fig. 1) | Corrects six of the defects                     | Corrects only one of the defects        |
| Glucose-lowering efficacy                      | Strong                                          | Strong                                  |
| Durability of HbA <sub>1c</sub> reduction      | Strong                                          | None                                    |
| Weight loss                                    | 3–4 kg                                          | 1–2 kg                                  |
| Blood pressure                                 | ~2–3 mmHg reduction                             | Neutral                                 |
| Lipid profile                                  | Lowers triglycerides, increases HDL cholesterol | Neutral                                 |
| Cardiovascular protection (MACE)               | Reduction by 13–26%                             | Neutral                                 |
| Renal protection                               | Reduction by 22%                                | Neutral                                 |
| Tolerability                                   | ~10–15% GI side effects                         | ~10–15% GI side effects                 |
| Dosing                                         | Weekly subcutaneous injection                   | Once to twice daily oral administration |
| Cost                                           | High                                            | Low                                     |

major core defects in T2D patients, i.e.,  $\beta$ -cell dysfunction and muscle insulin resistance. The major mechanism of action of metformin to reduce glycemia is inhibition of hepatic gluconeogenesis (61,62) (Fig. 3C), whereas the GLP-1 RAs also effectively reduce hepatic glucose

production but by multiple other mechanisms, i.e., inhibition of glucagon secretion, stimulation of insulin secretion, direct effect on the liver, and depletion of liver fat (26,27,30,59,66–68).

Although the UKPDS demonstrated that metformin caused a reduction in

cardiovascular events in T2D patients (65), the patient population consisted of a small number of obese T2D subjects ( $n = 342$ ); these results, by today's standards, would never be accepted as evidence for a cardiovascular benefit of the biguanide. Moreover, a beneficial

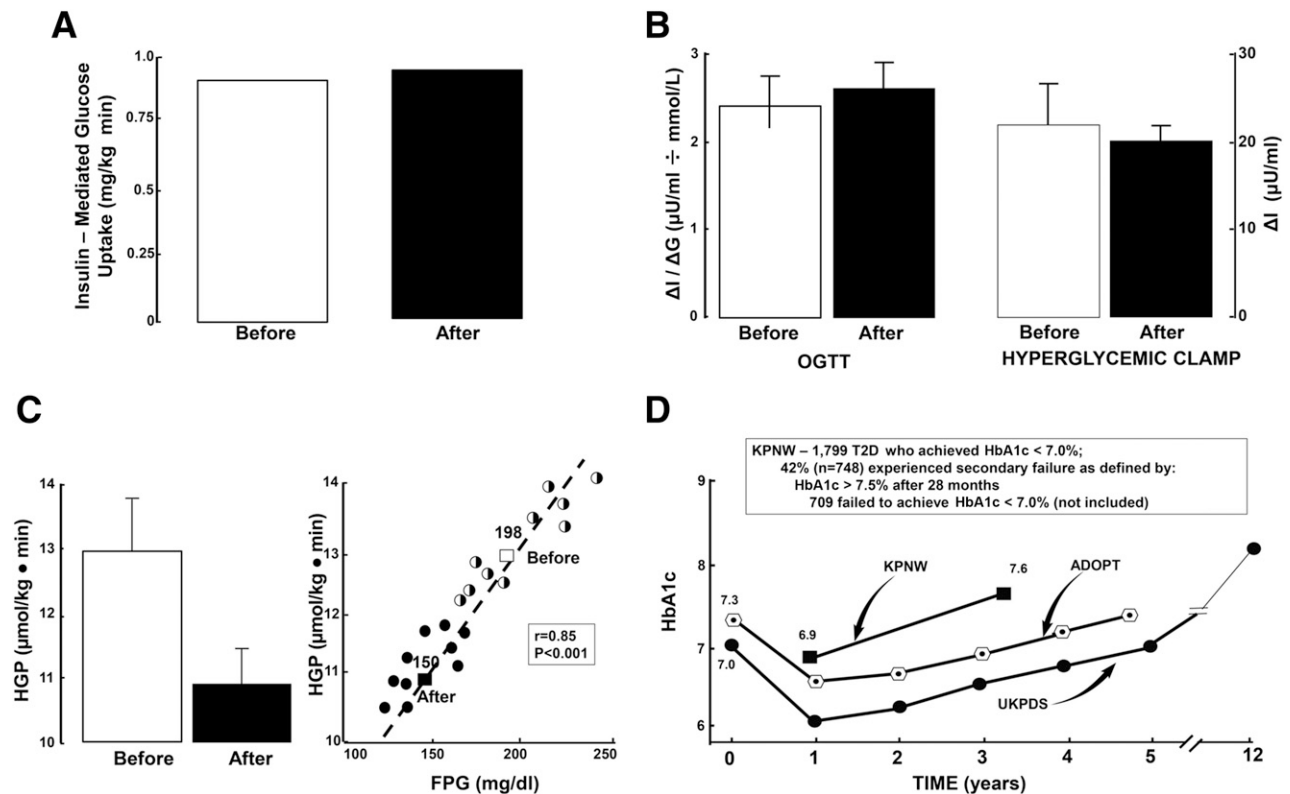

**Figure 3**—Effect of metformin on glycemic control, insulin secretion, and insulin sensitivity in T2D. **A:** Metformin does not improve muscle insulin sensitivity (measured with euglycemic insulin clamp) in T2D individuals ( $n = 20$ ) in the absence of weight loss (72). **B:** Metformin has no effect on  $\beta$ -cell function in T2D individuals ( $n = 14$ ) (measured with an oral glucose tolerance test [OGTT] and hyperglycemic clamp) (73). **C:** The primary effect via which metformin reduces the HbA<sub>1c</sub> in T2D is related to the suppression of hepatic glucose production (HGP) via inhibition of gluconeogenesis (72). FPG, fasting plasma glucose. **D:** Effect of metformin on HbA<sub>1c</sub>. Because metformin does not affect muscle insulin sensitivity or  $\beta$ -cell function, following an initial decline after metformin administration, the HbA<sub>1c</sub> rises progressively in T2D patients (5,6,74). KPNW, Kaiser Permanente Northwest.



effect on cardiovascular events was not observed in other clinical studies with metformin, i.e., the ADOPT study (5), which included twice the number of patients as the UKPDS ( $n = 818$ ). To the contrary, subjects receiving metformin in ADOPT experienced more cardiovascular events than subjects receiving glyburide, although this difference was not statistically significant. This emphasizes the problem of interpreting results from studies that are markedly underpowered to detect clinically significant differences in cardiac event rates. Conversely, the CVD benefit of GLP-1 RAs has conclusively been demonstrated in two very large, prospective cardiovascular intervention trials, LEADER and SUSTAIN-6 (9,10).

With regard to safety, both metformin and GLP-1 RAs are associated with gastrointestinal (GI) adverse events. Approximately 15–20% of T2D patients do not tolerate metformin because of GI side effects (66). The incidence of GI side effects with the long-acting GLP-1 RAs is similar to that of metformin. Further, and unlike those with metformin, the GI side effects usually are mild to moderate, waning over the first 4–6 weeks of initiating therapy. The percentage of patients who discontinue long-acting GLP-1 RAs because of GI side effects is significantly lower than that of metformin (67). Some postmarketing reports have suggested an increased risk of acute pancreatitis with GLP-1 RA use. However, three large, prospective, double-blind, placebo-controlled clinical trials including ~20,000 patients followed for 2–4 years have demonstrated no increased risk of acute pancreatitis with GLP-1 RA use (9,10,68).

Metformin is administered orally versus via injection for GLP-1 RAs. However, intermediate-acting metformin requires multiple daily dosing, whereas two long-acting GLP-1 RAs (exenatide and dulaglutide) are available as weekly injections and a third (semaglutide) is under review by the U.S. Food and Drug Administration. A subcutaneously implanted osmotic mini pump that continuously delivers exenatide for 6 months is expected to be approved within the next year (69), and an oral formulation of the GLP-1 RA semaglutide is in phase 3 trials (70) and is anticipated to be available within 3–4 years. These modern delivery methods will improve patient compliance for GLP-1 RAs versus metformin.

Lastly, metformin is generic and inexpensive, whereas GLP-1 RAs are still under patent and, therefore, expensive. However, most large health care plans have at least one GLP-1 RA on formulary with a modest copay. Moreover, liraglutide (Victoza) is expected to become generic by the end of 2017, and this should significantly reduce its cost. A cost-effective analysis is beyond the scope of this discussion, and the appropriate long-term, clinical, real-world studies to perform such an analysis are not available. However, a recent cost analysis for the treatment of T2D patients in the U.S. by the American Diabetes Association (71) demonstrated that only a small portion (12%) of the cost of T2D is due to the direct cost of antihyperglycemic medications. The vast majority of the cost of diabetes care is related to the development of diabetic vascular complications, with CVD disease contributing 50% of that cost, and two recent studies, LEADER and SUSTAIN-6, have demonstrated that GLP-1 RAs decrease cardiovascular events. Further, the cost of medications to treat the complications of diabetes is 50% greater than the cost of antihyperglycemic medications. It remains to be determined whether, on a long-term basis, the use of GLP-1 RAs, which in addition to causing a durable reduction in the plasma glucose concentration (thereby decreasing microvascular complications) also reduce cardiovascular events, will be cost-effective.

In summary, the currently available clinical and scientific evidence (Table 2) is overwhelmingly in favor of the use of GLP-1 RAs over metformin as first-line therapy in newly diagnosed T2D patients.

**Funding.** M.A.-G. receives funding from the National Institutes of Health (DK 097554-01) and the Qatar Foundation (National Priorities Research Program 4-248-3-076), and R.A.D. receives funding from the National Institutes of Health (DK 024092-42). R.A.D.'s salary is, in part, supported by the South Texas Veterans Health Care System, Audie L. Murphy Division.

**Duality of Interest.** R.A.D. is on the advisory board of AstraZeneca, Janssen, Novo Nordisk, Boehringer Ingelheim, and Intarcia. R.A.D. has received grants from AstraZeneca, Janssen, and Boehringer Ingelheim. R.A.D. is a member of the speakers' bureau for AstraZeneca and Novo Nordisk. No other potential conflicts of interest relevant to this article were reported.

## References

- DeFronzo RA. Banting Lecture. From the triumvirate to the ominous octet: a new paradigm for the treatment of type 2 diabetes mellitus. *Diabetes* 2009;58:773–795
- Inzucchi SE, Bergenstal RM, Buse JB, et al. Management of hyperglycemia in type 2 diabetes, 2015: a patient-centered approach: update to a position statement of the American Diabetes Association and the European Association for the Study of Diabetes. *Diabetes Care* 2015;38:140–149
- Garber AJ, Abrahamson MJ, Barzilay JL, et al.; American Association of Clinical Endocrinologists (AACE); American College of Endocrinology (ACE). Consensus statement of the American Association of Clinical Endocrinology and American College of Endocrinology on the comprehensive type 2 diabetes algorithm—2015 executive summary. *Endocr Pract* 2015;21:1403–1414
- International Diabetes Federation Clinical Guidelines Task Force. *Global Guideline for Type 2 Diabetes*. Brussels, Belgium, International Diabetes Federation, 2012, p. 44–46
- Kahn SE, Haffner SM, Heise MA, et al.; ADOPT Study Group. Glycemic durability of rosiglitazone, metformin, or glyburide monotherapy. *N Engl J Med* 2006;355:2427–2443
- United Kingdom Prospective Diabetes Study (UKPDS). 13: relative efficacy of randomly allocated diet, sulphonylurea, insulin, or metformin in patients with newly diagnosed non-insulin dependent diabetes followed for three years. *BMJ* 1995;310:83–88
- Abdul-Ghani MA, Puckett C, Triplitt C, et al. Initial combination therapy with metformin, pioglitazone and exenatide is more effective than sequential add-on therapy in subjects with new-onset diabetes. Results from the Efficacy and Durability of Initial Combination Therapy for Type 2 Diabetes (EDICT): a randomized trial. *Diabetes Obes Metab* 2015;17:268–275
- Abdul-Ghani M, Mujahid O, Mujahid A, et al. Combination therapy with exenatide plus pioglitazone versus basal/bolus insulin in patients with poorly controlled type 2 diabetes on sulphonylurea plus metformin: the QATAR Study. *Diabetes Care* 2017;40:325–331
- Marso SP, Daniels GH, Brown-Frandsen K, et al.; LEADER Steering Committee; LEADER Trial Investigators. Liraglutide and cardiovascular outcomes in type 2 diabetes. *N Engl J Med* 2016;375:311–322
- Marso SP, Bain SC, Consoli A, et al.; SUSTAIN-6 Investigators. Semaglutide and cardiovascular outcomes in patients with type 2 diabetes. *N Engl J Med* 2016;375:1834–1844
- Abdul-Ghani MA, DeFronzo RA. Pathogenesis of insulin resistance in skeletal muscle. *J Biomed Biotechnol* 2010;2010:476279
- Groop LC, Widén E, Ferrannini E. Insulin resistance and insulin deficiency in the pathogenesis of type 2 (non-insulin-dependent) diabetes mellitus: errors of metabolism or of methods? *Diabetologia* 1993;36:1326–1331
- Shalata A, Jazmawi W, Aslan O, et al. Early metabolic defects in Arab subjects with strong family history of type 2 diabetes. *J Endocrinol Invest* 2013;36:417–421
- Reaven GM. Relationships among insulin resistance, type 2 diabetes, essential hypertension, and cardiovascular disease: similarities and

- differences. *J Clin Hypertens* (Greenwich) 2011;13:238–243
15. Kashyap S, Belfort R, Gastaldelli A, et al. A sustained increase in plasma free fatty acids impairs insulin secretion in nondiabetic subjects genetically predisposed to develop type 2 diabetes. *Diabetes* 2003;52:2461–2474
  16. Kahn SE, Cooper ME, Del Prato S. Pathophysiology and treatment of type 2 diabetes: perspectives on the past, present, and future. *Lancet* 2014;383:1068–1083
  17. Alejandro EU, Gregg B, Blandino-Rosano M, Cras-Méneur C, Bernal-Mizrachi E. Natural history of  $\beta$ -cell adaptation and failure in type 2 diabetes. *Mol Aspects Med* 2015;42:19–41
  18. Halban PA, Polonsky KS, Bowden DW, et al.  $\beta$ -Cell failure in type 2 diabetes: postulated mechanisms and prospects for prevention and treatment. *Diabetes Care* 2014;37:1751–1758
  19. Saad MF, Knowler WC, Pettitt DJ, Nelson RG, Mott DM, Bennett PH. The natural history of impaired glucose tolerance in the Pima Indians. *N Engl J Med* 1988;319:1500–1506
  20. Ferrannini E, Gastaldelli A, Miyazaki Y, Matsuda M, Mari A, DeFronzo RA.  $\beta$ -Cell function in subjects spanning the range from normal glucose tolerance to overt diabetes: a new analysis. *J Clin Endocrinol Metab* 2005;90:493–500
  21. Ferrannini E, Mari A.  $\beta$ -Cell function in type 2 diabetes. *Metabolism* 2014;63:1217–1227
  22. Polonsky KS. Lilly Lecture 1994. The  $\beta$ -cell in diabetes: from molecular genetics to clinical research. *Diabetes* 1995;44:705–717
  23. Jornayvaz FR, Samuel VT, Shulman GI. The role of muscle insulin resistance in the pathogenesis of atherogenic dyslipidemia and nonalcoholic fatty liver disease associated with the metabolic syndrome. *Annu Rev Nutr* 2010;30:273–290
  24. Reaven GM. Insulin resistance: the link between obesity and cardiovascular disease. *Med Clin North Am* 2011;95:875–892
  25. DeFronzo RA. Insulin resistance, lipotoxicity, type 2 diabetes and atherosclerosis: the missing links. The Claude Bernard Lecture 2009. *Diabetologia* 2010;53:1270–1287
  26. Nauck MA, Meier JJ. The incretin effect in healthy individuals and those with type 2 diabetes: physiology, pathophysiology, and response to therapeutic interventions. *Lancet Diabetes Endocrinol* 2016;4:525–536
  27. Holst JJ, Gribble F, Horowitz M, Rayner CK. Roles of the gut in glucose homeostasis. *Diabetes Care* 2016;39:884–892
  28. Matsuda M, DeFronzo RA, Glass L, et al. Glucagon dose-response curve for hepatic glucose production and glucose disposal in type 2 diabetic patients and normal individuals. *Metabolism* 2002;51:1111–1119
  29. Knop FK, Vilsbøll T, Madsbad S, Holst JJ, Krarup T. Inappropriate suppression of glucagon during OGTT but not during isoglycaemic i.v. glucose infusion contributes to the reduced incretin effect in type 2 diabetes mellitus. *Diabetologia* 2007;50:797–805
  30. Sandoval DA, D'Alessio DA. Physiology of proglucagon peptides: role of glucagon and GLP-1 in health and disease. *Physiol Rev* 2015;95:513–548
  31. Gamble JM, Clarke A, Myers KJ, et al. Incretin-based medications for type 2 diabetes: an overview of reviews. *Diabetes Obes Metab* 2015;17:649–658
  32. Umapathysivam MM, Lee MY, Jones KL, et al. Comparative effects of prolonged and intermittent stimulation of the glucagon-like peptide 1 receptor on gastric emptying and glycemia. *Diabetes* 2014;63:785–790
  33. Chang AM, Jakobsen G, Sturis J, et al. The GLP-1 derivative NN2211 restores  $\beta$ -cell sensitivity to glucose in type 2 diabetic patients after a single dose. *Diabetes* 2003;52:1786–1791
  34. Kapitza C, Dahl K, Jacobsen JB, Axelsen MB, Flint A. The effects of semaglutide on  $\beta$ -cell function in subjects with type 2 diabetes (Abstract). *Diabetes* 2016;65(Suppl. 1):A262
  35. Bunck MC, Cornér A, Eliasson B, et al. Effects of exenatide on measures of  $\beta$ -cell function after 3 years in metformin-treated patients with type 2 diabetes. *Diabetes Care* 2011;34:2041–2047
  36. Klonoff DC, Buse JB, Nielsen LL, et al. Exenatide effects on diabetes, obesity, cardiovascular risk factors and hepatic biomarkers in patients with type 2 diabetes treated for at least 3 years. *Curr Med Res Opin* 2008;24:275–286
  37. Diamant M, Van Gaal L, Guerci B, et al. Exenatide once weekly versus insulin glargine for type 2 diabetes (DURATION-3): 3-year results of an open-label randomised trial. *Lancet Diabetes Endocrinol* 2014;2:464–473
  38. Eldor R, Daniele G, Huerta C, et al. Discordance between central (brain) and pancreatic action of exenatide in lean and obese subjects. *Diabetes Care* 2016;39:1804–1810
  39. van Bloemendaal L, Ten Kulve JS, la Fleur SE, Ijzerman RG, Diamant M. Effects of glucagon-like peptide 1 on appetite and body weight: focus on the CNS. *J Endocrinol* 2014;221:T1–T16
  40. Armstrong MJ, Hull D, Guo K, et al. Glucagon-like peptide 1 decreases lipotoxicity in non-alcoholic steatohepatitis. *J Hepatol* 2016;64:399–408
  41. Cusi K. Treatment of patients with type 2 diabetes and non-alcoholic fatty liver disease: current approaches and future directions. *Diabetologia* 2016;59:1112–1120
  42. Mann JF, Brown Frandsen K, Daniels G, et al. Liraglutide and renal outcomes in type 2 diabetes: results of the LEADER trial (Abstract). *J Am Soc Nephrol* 2016;27(Abstract Edition):1B
  43. Buse JB, DeFronzo RA, Rosenstock J, et al. The primary glucose-lowering effect of metformin resides in the gut, not the circulation: results from short-term pharmacokinetic and 12-week dose-ranging studies. *Diabetes Care* 2016;39:198–205
  44. DeFronzo RA, Buse JB, Kim T, et al. Once-daily delayed-release metformin lowers plasma glucose and enhances fasting and postprandial GLP-1 and PYY: results from two randomised trials. *Diabetologia* 2016;59:1645–1654
  45. Sarwar N, Gao P, Seshasai SR, et al.; Emerging Risk Factors Collaboration. Diabetes mellitus, fasting blood glucose concentration, and risk of vascular disease: a collaborative meta-analysis of 102 prospective studies. *Lancet* 2010;375:2215–2222
  46. Di Angelantonio E, Kaptoge S, Wormser D, et al.; Emerging Risk Factors Collaboration. Association of cardiometabolic multimorbidity with mortality [published correction appears in *JAMA* 2015;314:1179]. *JAMA* 2015;314:52–60
  47. Dormandy JA, Charbonnel B, Eckland DJ, et al.; PROactive Investigators. Secondary prevention of macrovascular events in patients with type 2 diabetes in the PROactive Study (PROspective pioglitAzone Clinical Trial In macroVascular Events): a randomised controlled trial. *Lancet* 2005;366:1279–1289
  48. Kernan WN, Viscoli CM, Furie KL, et al.; IRIS Trial Investigators. Pioglitazone after ischemic stroke or transient ischemic attack. *N Engl J Med* 2016;374:1321–1331
  49. Zinman B, Wanner C, Lachin JM, et al.; EMPA-REG OUTCOME Investigators. Empagliflozin, cardiovascular outcomes, and mortality in type 2 diabetes. *N Engl J Med* 2015;373:2117–2128
  50. Wu JH, Foote C, Blomster J, et al. Effects of sodium-glucose cotransporter-2 inhibitors on cardiovascular events, death, and major safety outcomes in adults with type 2 diabetes: a systematic review and meta-analysis. *Lancet Diabetes Endocrinol* 2016;4:411–419
  51. Simpson SH, Majumdar SR, Tsuyuki RT, Eurich DT, Johnson JA. Dose-response relation between sulfonylurea drugs and mortality in type 2 diabetes mellitus: a population-based cohort study. *CMAJ* 2006;174:169–174
  52. Evans JM, Ogston SA, Emslie-Smith A, Morris AD. Risk of mortality and adverse cardiovascular outcomes in type 2 diabetes: a comparison of patients treated with sulfonylureas and metformin. *Diabetologia* 2006;49:930–936
  53. Scirica BM, Bhatt DL, Braunwald E, et al.; SAVOR-TIMI 53 Steering Committee and Investigators. Saxagliptin and cardiovascular outcomes in patients with type 2 diabetes mellitus. *N Engl J Med* 2013;369:1317–1326
  54. White WB, Cannon CP, Heller SR, et al.; EXAMINE Investigators. Alogliptin after acute coronary syndrome in patients with type 2 diabetes. *N Engl J Med* 2013;369:1327–1335
  55. Green JB, Bethel MA, Armstrong PW, et al.; TECOS Study Group. Effect of sitagliptin on cardiovascular outcomes in type 2 Diabetes. *N Engl J Med* 2015;373:232–242
  56. Gerstein HC, Bosch J, Dagenais GR, et al.; ORIGIN Trial Investigators. Basal insulin and cardiovascular and other outcomes in dysglycemia. *N Engl J Med* 2012;367:319–328
  57. Verge D, López X. Impact of GLP-1 and GLP-1 receptor agonists on cardiovascular risk factors in type 2 diabetes. *Curr Diabetes Rev* 2010;6:191–200
  58. Koska J, Sands M, Burciu C, et al. Exenatide protects against glucose- and lipid-induced endothelial dysfunction: evidence for direct vasodilation effect of GLP-1 receptor agonists in humans. *Diabetes* 2015;64:2624–2635
  59. Campbell JE, Drucker DJ. Pharmacology, physiology, and mechanisms of incretin hormone action. *Cell Metab* 2013;17:819–837
  60. Drucker DJ. The cardiovascular biology of glucagon-like peptide-1. *Cell Metab* 2016;24:15–30
  61. DeFronzo RA, Goodman AM; The Multicenter Metformin Study Group. Efficacy of metformin in patients with non-insulin-dependent diabetes mellitus. *N Engl J Med* 1995;333:541–549
  62. Cusi K, DeFronzo RA. Metformin: a review of its metabolic effects. *Diabetes Reviews* 1998;6:89–131
  63. Natali A, Ferrannini E. Effects of metformin and thiazolidinediones on suppression of hepatic glucose production and stimulation of glucose uptake in type 2 diabetes: a systematic review. *Diabetologia* 2006;49:434–441
  64. Jensen JB, Gormsen LC, Sundelin E, et al. Organ-specific uptake and elimination of metformin can be determined in vivo in mice and humans by PET-imaging using a novel  $^{11}\text{C}$ -metformin tracer (Abstract). *Diabetes* 2015;64(Suppl. 1):LB33

65. UK Prospective Diabetes Study (UKPDS) Group. Effect of intensive blood-glucose control with metformin on complications in overweight patients with type 2 diabetes (UKPDS 34). *Lancet* 1998;352:854–865
66. Hare KJ, Knop FK, Asmar M, et al. Preserved inhibitory potency of GLP-1 on glucagon secretion in type 2 diabetes mellitus. *J Clin Endocrinol Metab* 2009;94:4679–4687
67. Jendle J, Grunberger G, Blevins T, Giorgino F, Hietpas RT, Botros FT. Efficacy and safety of dulaglutide in the treatment of type 2 diabetes: a comprehensive review of the dulaglutide clinical data focusing on the AWARD phase 3 clinical trial program. *Diabetes Metab Res Rev* 2016;32:776–790
68. Pfeffer MA, Claggett B, Diaz R, et al.; ELIXA Investigators. Lixisenatide in patients with type 2 diabetes and acute coronary syndrome. *N Engl J Med* 2015;373:2247–2257
69. Henry RR, Rosenstock J, Logan D, Alessi T, Luskey K, Baron MA. Continuous subcutaneous delivery of exenatide via ITCA 650 leads to sustained glycemic control and weight loss for 48 weeks in metformin-treated subjects with type 2 diabetes. *J Diabetes Complications* 2014;28:393–398
70. Novo Nordisk A/S. Efficacy and long-term safety of oral semaglutide versus sitagliptin in subjects with type 2 diabetes (PIONEER 3). In: *ClinicalTrials.gov* [Internet]. Bethesda, MD, National Library of Medicine, 2017. Available from <https://clinicaltrials.gov/ct2/show/NCT2607865>. NLM Identifier: NCT02607865. Accessed 18 May 2017
71. American Diabetes Association. Economic costs of diabetes in the U.S. in 2012. *Diabetes Care* 2013;36:1033–1046
72. Cusi K, Consoli A, DeFronzo A. Metabolic effects of metformin on glucose and lactate metabolism in noninsulin-dependent diabetes mellitus. *J Clin Endocrinol Metab* 1996;81:4059–4067
73. DeFronzo RA, Barzilai N, Simonson DC. Mechanism of metformin action in obese and lean non-insulin-dependent diabetic subjects. *J Clin Endocrinol Metab* 1991;73:1294–1301
74. Brown JB, Conner C, Nichols GA. Secondary failure of metformin monotherapy in clinical practice. *Diabetes Care* 2010;33:501–506
